# Supplementary material
Source: PubMed Central journal article supplement (PMC5893436)
Supplement: NIHMS942107-supplement-1.pdf [file NIHMS942107-supplement-1.pdf]

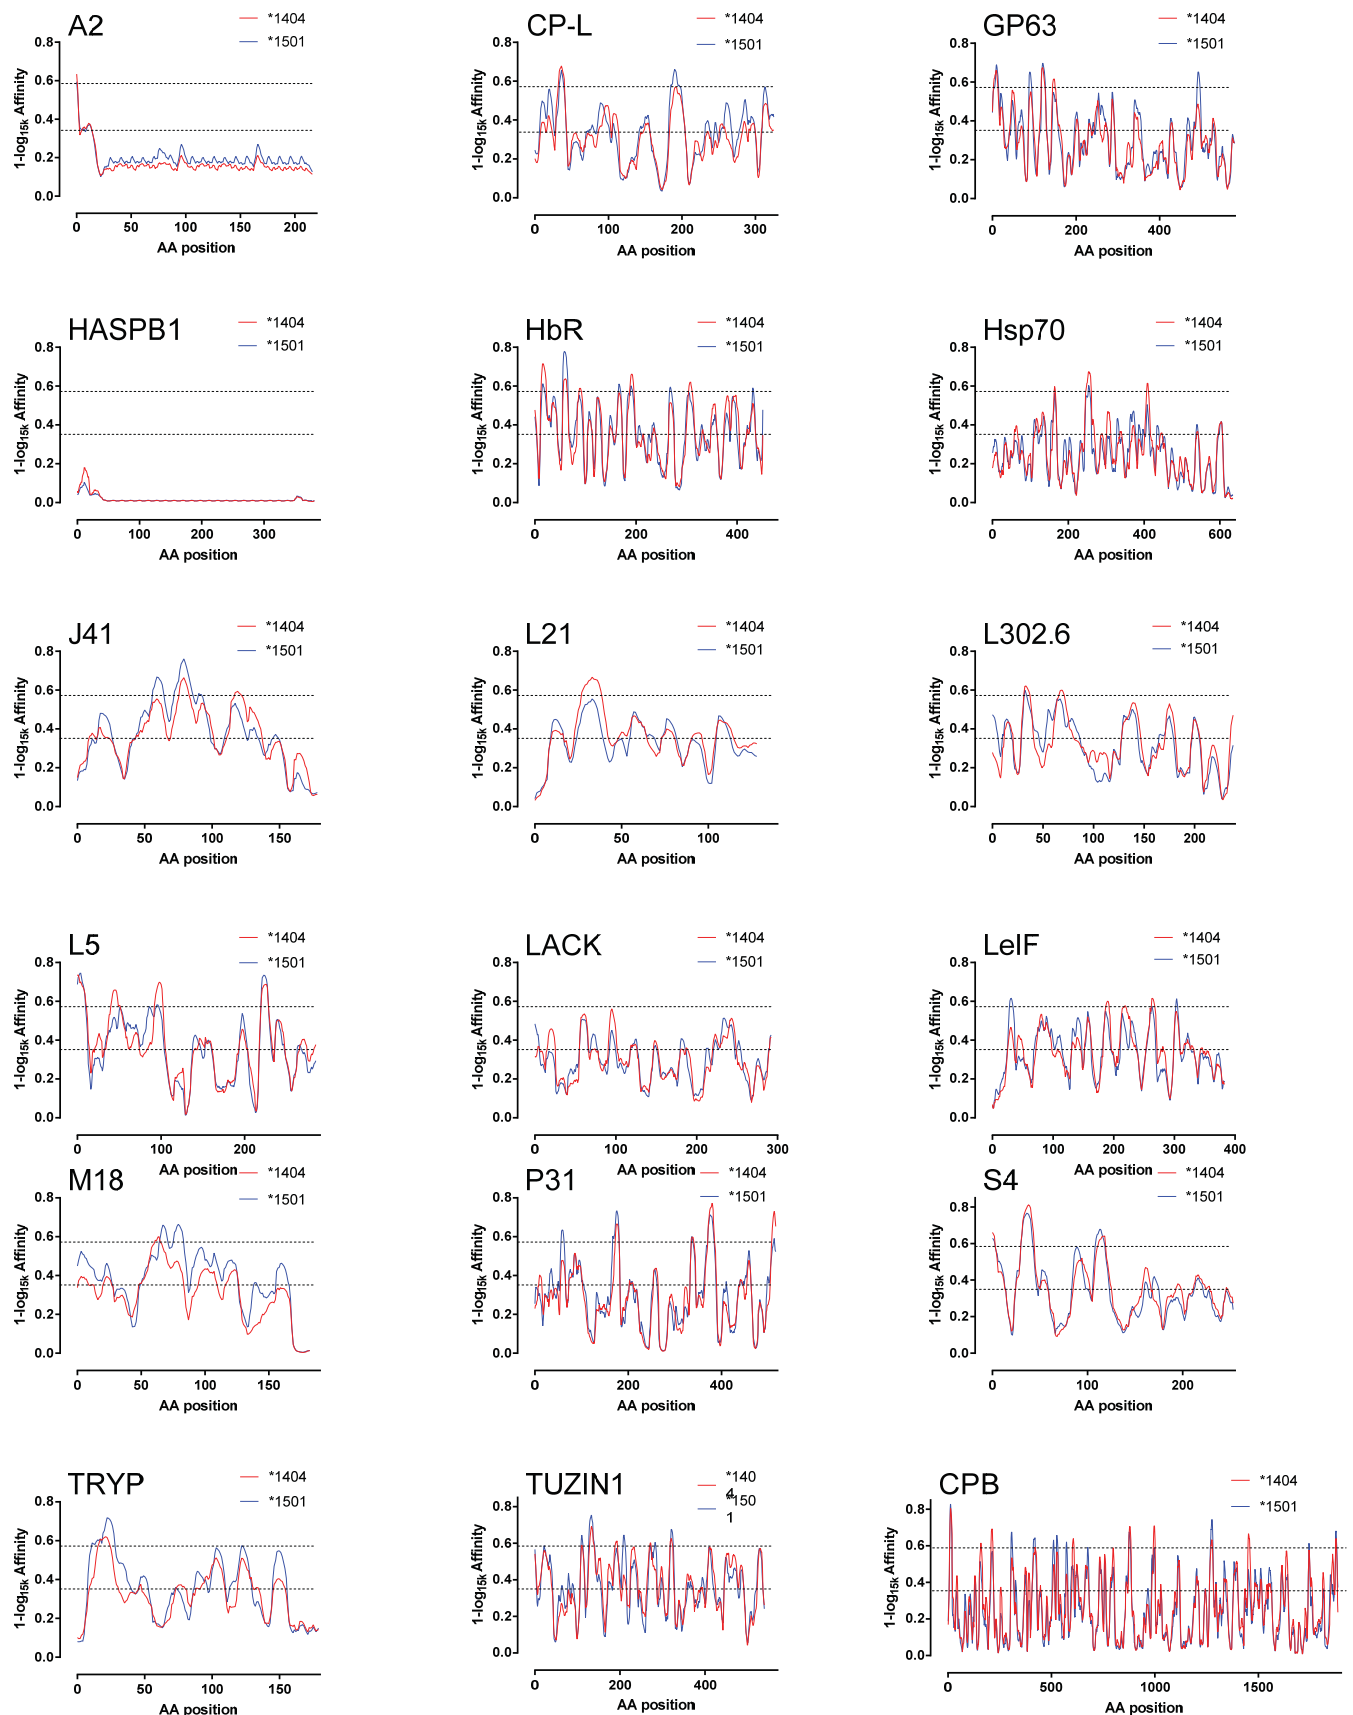

**Figure S1.** Plots showing binding affinities for epitopes across a selection of 49 Leishmania vaccine candidate proteins predicted to bind to HLA DRB1 class II molecules. Epitope binding predictions were performed in NetMHCIIpan2.1. The y-axis shows the relative binding affinity (expressed as  $1-\log_{15,000}$  of the nM binding affinity) for risk \*1404 (red) and protective \*1501 (blue) DRB1 alleles; the x-axis indicates the amino acid sequence locations for proteins, equivalent to the start position of overlapping 20mers (1-mer sliding window) in vaccine proteins as listed in Table S1. Horizontal dotted lines show cut-offs for different nM binding affinities; the upper line indicates the value above which binding achieves  $>50$  nM, the lower line indicates the value above which binding achieves  $>500$  nM.

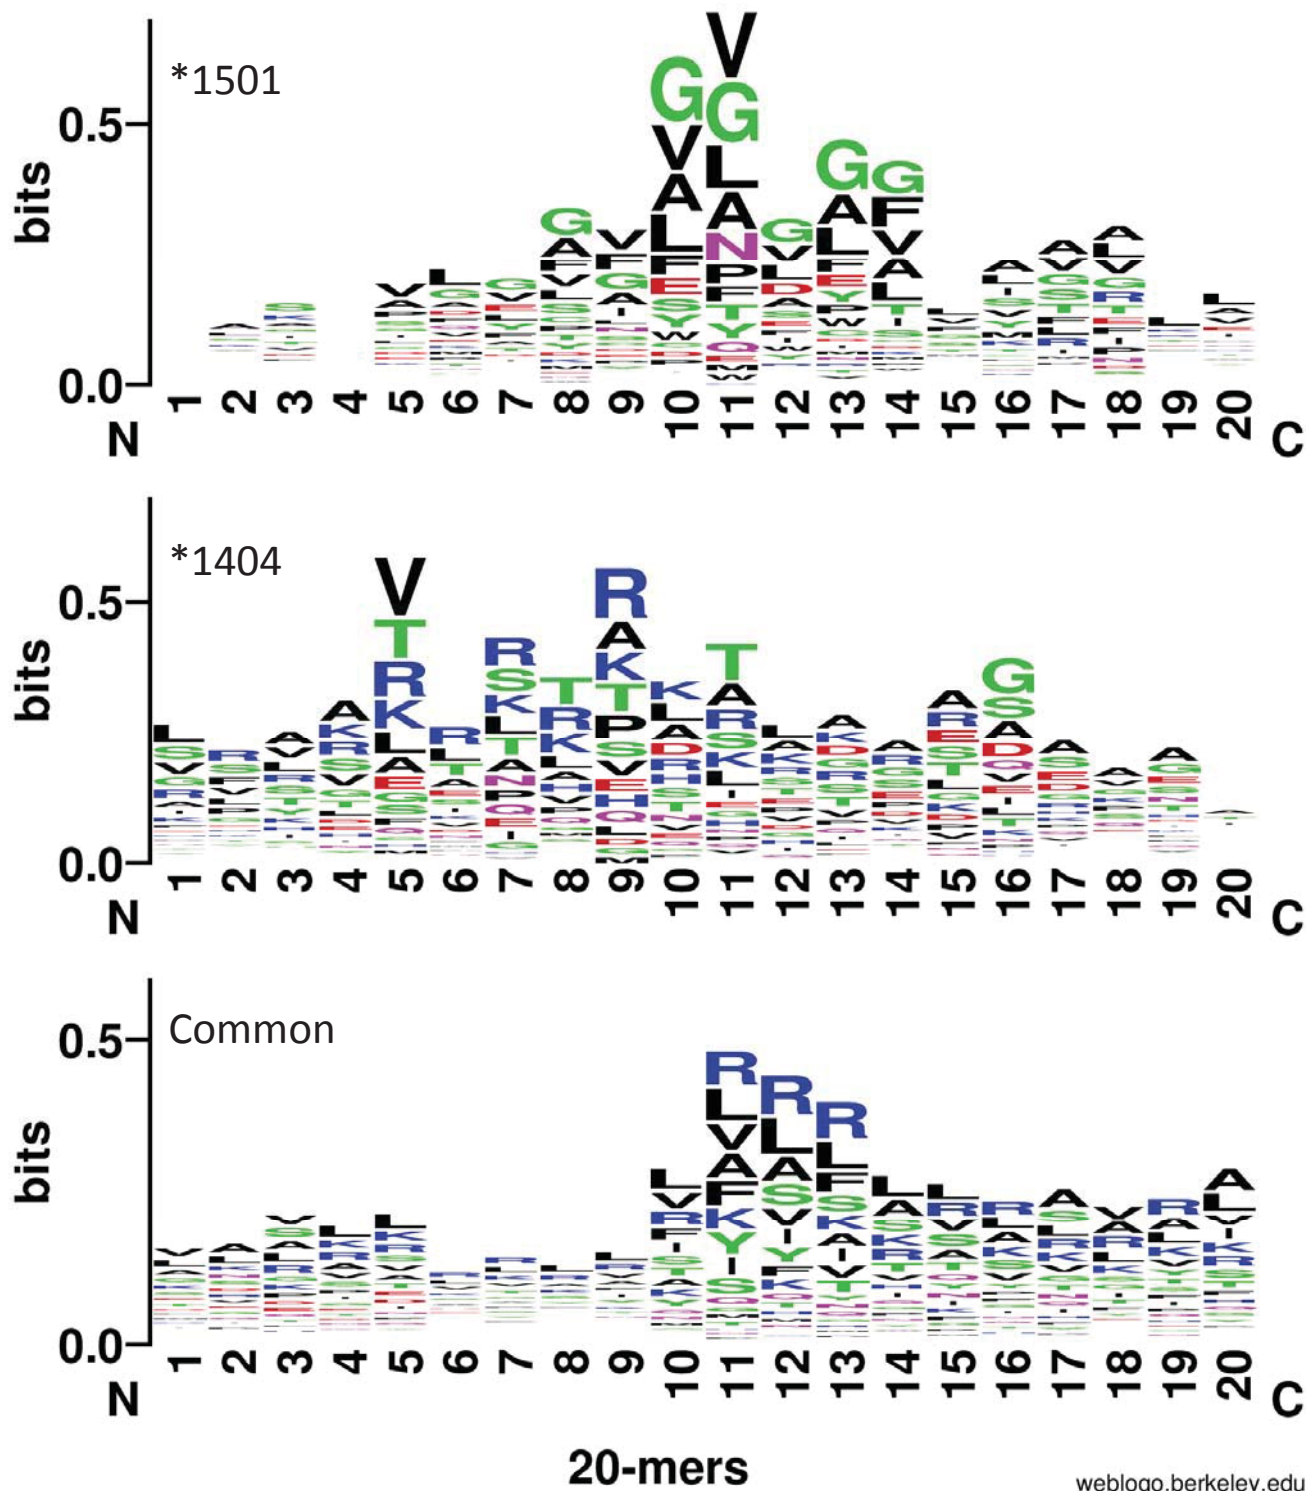

weblogo.berkeley.edu

**Figure S2.** WebLogo plots of 20-mers at binding peaks for NetMHCIIpan v2.1 analysis.

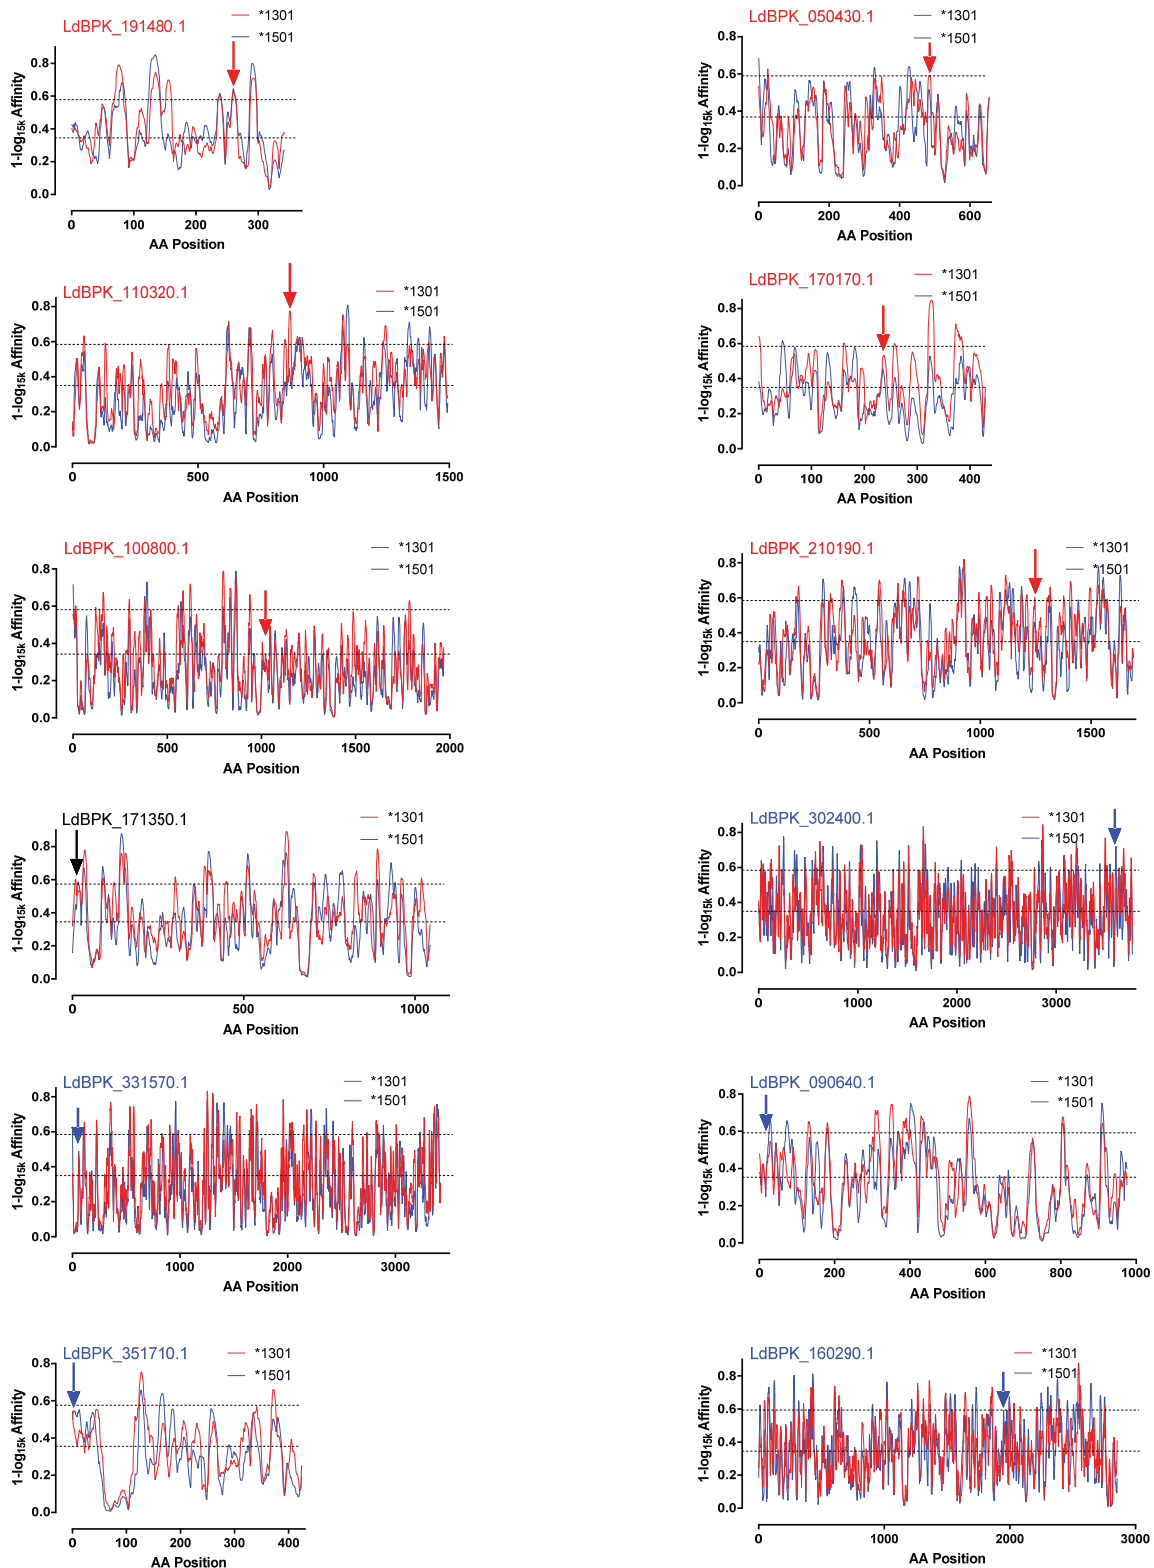

**Figure S3.** Plots showing binding affinities across *Leishmania* proteins from which captured epitopes derive, as predicted to bind to HLA DRB1 class II molecules. Epitope binding predictions were performed in NetMHCIIpan 2.1. The y-axis shows the relative binding affinity (expressed as  $1 - \log_{15,000}$  of the nM binding affinity) for risk \*1301 (red) and protective \*1501 (blue) DRB1 alleles; the x-axis indicates the amino acid sequence locations for proteins, equivalent to the start position of overlapping 20mers (1-mer sliding window) in 12proteins as listed in Table II of the main text. Horizontal dotted lines show cut-offs for different nM binding affinities; the upper line indicates the value above which binding achieves =50 nM, the lower line indicates the value above which binding achieves =500 nM. Arrows indicated the position in the sequence of the captured epitopes, data for which was used to select 20-mer peptides to be synthesized for ex vivo stimulation assays, as outlined in Table S2. Gene names on the plots and arrows are colour -coded according to whether the epitopes were originally captured from dendritic cells homozygous for \*1301 risk (red), \*1501 protective (blue), or from both (black).

**Table S1. (A):** List of 12 20-mer peptides selected to represent epitopes with the best binding affinity for risk (DRB1\*1301) or protective (DRB1\*1501) DRB1 alleles from which peptides were captured. Affinities are based on NetMHCIIpan analysis of overlapping 20-mers across the full-length proteins identified from the epitope capture experiment. Binding affinity  $\leq 50\text{nM}$  = high;  $>50\text{nM}$  = low. Bold indicates 9-mer core for peak affinity of binding to appropriate DRB1 allele from which peptides were captured. Colour coded for cross-reference to Figures 4, 5, and S3. **(B) and (C):** Examples of selection of 9-mer core epitopes for exclusive binders to (B) DRB1\*1404 or (C) DRB1\*1501 as indicated. Exclusive binders were defined as those with  $\leq 500\text{nM}$  affinity for one DRB1 allele and  $\geq 1000\text{nM}$  for the alternative allele.

| (A) Peptide name        | DRB1 allele from which peptides were captured | Peptide sequence_N to C terminus | DRB1_1301 nM | DRB1_1501 nM | Affinity status relative to captured DRB1 type |
|-------------------------|-----------------------------------------------|----------------------------------|--------------|--------------|------------------------------------------------|
| P45.260_LdBPK_191480.1  | DRB1*1301                                     | LSSEAKA <b>FILSQ</b> PRRPALSF    | 35.3         | 30.3         | High                                           |
| P46.485_LdBPK_050430.1  | DRB1*1301                                     | GDT <b>PAIIRQ</b> PGGFTIIDADN    | 50.3         | 116.1        | High                                           |
| P48.865_LdBPK_110320.1  | DRB1*1301                                     | FESLEVL <b>LRANNI</b> LPFGG      | 8.7          | 252.5        | High                                           |
| P43.237_LdBPK_170170.1  | DRB1*1301                                     | LQDVYK <b>IGGIGT</b> VPVGRVET    | 87.7         | 249.7        | Low                                            |
| P47.1022_LdBPK_100800.1 | DRB1*1301                                     | FSFTNLAE <b>IGRTGELL</b> LPQ     | 544.2        | 1114         | Low                                            |
| P49.1382_LdBPK_210190.1 | DRB1*1301                                     | DL <b>VTASAALLQ</b> SAATHDSI     | 98.7         | 298.6        | Low                                            |
| P44.24_LdBPK_171350.1   | DRB1*1301 and DRB1*1501                       | LILL <b>VGDRAK</b> DQVVNLHLM     | 108.4        | 251.9        | Low for both                                   |
| P53.3543_LdBPK_302400.1 | DRB1*1501                                     | MDCEAG <b>FIALTARCV</b> HSLVV    | 102.4        | 38.3         | High                                           |
| P50.3_LdBPK_351710.1    | DRB1*1501                                     | SNVGV <b>CSR</b> GVARLWFRVCQ     | 191.4        | 79           | Low                                            |
| P51.21_LdBPK_090640.1   | DRB1*1501                                     | GAGSGKT <b>QMAARIA</b> YLLQS     | 220          | 165          | Low                                            |
| P52.734_LdBPK_331570.1  | DRB1*1501                                     | SPP <b>RVVTAATAPV</b> GSPTAAA    | 34.7         | 1165.3       | Low                                            |
| P54.1934_LdBPK_160290.1 | DRB1*1501                                     | QRA <b>ALLGACTLLQ</b> QGHGMQ     | 483          | 297.9        | Low                                            |

| (B) |                                | DRB1_1404 |           |        |          |       | DRB1_1501 |        |          |        |  |
|-----|--------------------------------|-----------|-----------|--------|----------|-------|-----------|--------|----------|--------|--|
| Pos | Peptide                        | ID        | core      | Offset | 1-log15k | nM    | core      | Offset | 1-log15k | nM     |  |
| 567 | EVKIAAEREEL <b>LKRTKVLQ</b> SQ | PRP-2     | LKRTKVLQS | 10     | 0.399    | 323.5 | LKRTKVLQS | 10     | 0.213    | 1934   |  |
| 568 | VKIAAEREEL <b>LKRTKVLQ</b> SQQ | PRP-2     | LKRTKVLQS | 9      | 0.4589   | 181.8 | LKRTKVLQS | 9      | 0.2354   | 1560.3 |  |
| 569 | KIAAEREEL <b>LKRTKVLQ</b> SQQY | PRP-2     | LKRTKVLQS | 8      | 0.524    | 97.3  | LKRTKVLQS | 8      | 0.2769   | 1046.2 |  |
| 139 | GR <b>VRVLIQRK</b> SETTEGNKHK  | 584C_L31  | VRVLIQRKS | 2      | 0.4604   | 179.3 | VRVLIQRKS | 2      | 0.2488   | 1370.9 |  |
| 140 | <b>RVRVLIQRK</b> SETTEGNKHK    | 584C_L31  | VRVLIQRKS | 1      | 0.4179   | 269.8 | VRVLIQRKS | 1      | 0.2025   | 2140   |  |
| 15  | AMADRPRKL <b>TSKGKVKH</b> KRG  | Lepp12    | LTSKGKVKH | 8      | 0.3812   | 383.9 | LTSKGKVKH | 8      | 0.2787   | 1028.7 |  |
| 16  | MADRPRKL <b>TSKGKVKH</b> KRGD  | Lepp12    | LTSKGKVKH | 7      | 0.3723   | 418.3 | LTSKGKVKH | 7      | 0.2689   | 1130.2 |  |
| 17  | ADRPRKL <b>TSKGKVKH</b> KRGDL  | Lepp12    | LTSKGKVKH | 6      | 0.3707   | 424.5 | LTSKGKVKH | 6      | 0.2652   | 1171.1 |  |
| 18  | DRPRKL <b>TSKGKVKH</b> KRGDLK  | Lepp12    | LTSKGKVKH | 5      | 0.3773   | 398.4 | LTSKGKVKH | 5      | 0.2686   | 1132.9 |  |
| 19  | RPRKL <b>TSKGKVKH</b> KRGDLKM  | Lepp12    | LTSKGKVKH | 4      | 0.3879   | 359.8 | LTSKGKVKH | 4      | 0.278    | 1035.7 |  |

  

| (C) |                                | DRB1_1404 |           |        |          |        | DRB1_1501 |        |          |       |  |
|-----|--------------------------------|-----------|-----------|--------|----------|--------|-----------|--------|----------|-------|--|
| Pos | Peptide                        | ID        | core      | Offset | 1-log15k | nM     | core      | Offset | 1-log15k | nM    |  |
| 0   | MATMEN <b>NVAFAGY</b> AYYSTGGE | L302_06   | NVAFAGYAY | 5      | 0.2789   | 1026.5 | NVAFAGYAY | 5      | 0.4731   | 158.6 |  |
| 1   | ATMEN <b>NVAFAGY</b> AYYSTGGEG | L302_06   | NVAFAGYAY | 4      | 0.2622   | 1205   | NVAFAGYAY | 4      | 0.4663   | 169.3 |  |
| 2   | TMEN <b>NVAFAGY</b> AYYSTGGEGF | L302_06   | VAFAGYAY  | 4      | 0.2523   | 1325.4 | NVAFAGYAY | 3      | 0.4566   | 185.9 |  |
| 3   | MEN <b>NVAFAGY</b> AYYSTGGEGFI | L302_06   | VAFAGYAY  | 3      | 0.2445   | 1429.2 | NVAFAGYAY | 2      | 0.4345   | 229.8 |  |
| 4   | <b>ENVAFAGY</b> AYYSTGGEGFIY   | L302_06   | VAFAGYAY  | 2      | 0.2268   | 1694.4 | NVAFAGYAY | 1      | 0.4012   | 316.8 |  |
| 5   | <b>NVAFAGY</b> AYYSTGGEGFIYA   | L302_06   | VAFAGYAY  | 1      | 0.2156   | 1887.6 | NVAFAGYAY | 0      | 0.3722   | 418.6 |  |
| 142 | GAVGGDQNNL <b>IGQFGVGF</b> YS  | LPG3      | IGQFGVGFY | 10     | 0.1922   | 2362.5 | IGQFGVGFY | 10     | 0.3708   | 424.4 |  |
| 143 | AVGGDQNNL <b>IGQFGVGF</b> YSV  | LPG3      | IGQFGVGFY | 9      | 0.2259   | 1709.6 | IGQFGVGFY | 9      | 0.4461   | 205.7 |  |
| 144 | VGGDQNNL <b>IGQFGVGF</b> YSVF  | LPG3      | IGQFGVGFY | 8      | 0.2502   | 1353.3 | IGQFGVGFY | 8      | 0.4934   | 130.6 |  |
| 145 | GGDQNNL <b>IGQFGVGF</b> YSVFL  | LPG3      | IGQFGVGFY | 7      | 0.2521   | 1328.5 | IGQFGVGFY | 7      | 0.4945   | 129.1 |  |
| 146 | GDQNNL <b>IGQFGVGF</b> YSVFLV  | LPG3      | IGQFGVGFY | 6      | 0.2654   | 1168.4 | IGQFGVGFY | 6      | 0.5023   | 119.8 |  |
| 147 | DQNNL <b>IGQFGVGF</b> YSVFLVG  | LPG3      | LIGQFGVGF | 4      | 0.2639   | 1185.8 | IGQFGVGFY | 5      | 0.5001   | 122.3 |  |
| 148 | QNNL <b>IGQFGVGF</b> YSVFLVGD  | LPG3      | LIGQFGVGF | 3      | 0.2564   | 1274   | IGQFGVGFY | 4      | 0.4888   | 136.3 |  |
